# Supplementary material
Source: Elsevier journal article supplement (https://www.sciencedirect.com/science/article/pii/S021057051500117X)
Supplement: mmc1 [file S021057051500117X:mmc1.doc]

**Tabla 1:** Costes unitarios de los medicamentos

| **Nombre medicamento** | **gramo/**  **unidad** | **Posología** | **Dosis diaria (g)** | **Unidades/**  **día** | **Unidades/**  **semana** | **Tamaño del envase** | **g/envase** | **Envases/**  **día** | **Coste del envase** | **Coste/día** | **Coste dos meses de tratamiento** |
| --- | --- | --- | --- | --- | --- | --- | --- | --- | --- | --- | --- |
| **AMINOSALICILATOS orales usados a dosis <2g/día** | | | | | | | | | | | |
| CLAVERSAL Comp. gastrorresistentes 500 mg | 0.5 | hasta 4g/día | 1.5g | 3 | 21 | 100 | 50 | 0.030 | 28.01 € | 0.84 € | 50.94 € |
| PENTASA Granulado de liberación prolongada 1g | 1 | hasta 4g/día | 2g | 2 | 14 | 50 | 50 | 0.040 | 44.38 € | 1.78 € | 107.61 € |
| PENTASA Granulado de liberación prolongada 1g | 1 | hasta 4g/día | 2g | 2 | 14 | 100 | 100 | 0.020 | 88.76 € | 1.78 € | 107.61 € |
| PENTASA Granulado de liberación prolongada 2g | 2 | hasta 4g/día | 2g | 1 | 7 | 60 | 120 | 0.017 | 106.53 € | 1.78 € | 107.63 € |
| Lixacol 400mg 100 comp | 0.4 | 2.4g-800mg al día | 1,6g | 2 | 14 | 100 | 40 | 0.020 | 34.42 € | 0.69 € | 41.73 € |
| Salofalk 1.5g granulado de liberación prolongada gastrorresistente. | 1.5 | 1.5–3g al día | 1.5g | 1 | 7 | 100 | 150 | 0.010 | 133.16 € | 1.33 € | 80.72 € |
| Salofalk_1000mg granulado de liberación prolongada gastrorresistente. | 1 | 2–3g al día | 2g | 2 | 14 | 100 | 100 | 0.020 | 88.76 € | 1.78 € | 107.61 € |
| Salofalk_ 1000mg granulado de liberación prolongada gastrorresistente. | 1 | 2–3g al día | 2 | 2 | 14 | 50 | 50 | 0.040 | 44.38 € | 1.78 € | 107.61 € |
| **Coste promedio por día para dosis <2g/día** | | | | | | | | | | **1.84 €** |  |
| **Coste promedio para dos meses de tratamiento para dosis< 2g/día** | | | | | | | | | | **111.46 €** | **DE 42,17€** |

**AMINOSALICILATOS orales usados a dosis >2g/día (dosis por periodo calculadas en función del número de cajas)**

| **MESALAZINA** | **gramo/**  **unidad** | **Posología** | **Dosis diaria (g)** | **Unidades/**  **día** | **Unidades/**  **semana** | **Tamaño del envase** | **g/envase** | **Envases/**  **día** | **Coste del envase** | **Coste/día** | **Coste mes de tratamiento** |  |
| --- | --- | --- | --- | --- | --- | --- | --- | --- | --- | --- | --- | --- |
| **Mezavant 1,2g** comprimidos de liberación prolongada gastrorresistentes. | 1,2 | 2.4g/día | 2,4 | 2 | 14 | 60 | 72 | 0,033 | 103,03 € | 3,43 € | 103,03 € |  |
| **Mezavant 1,2g** comprimidos de liberación prolongada gastrorresistentes | 1,2 | 3.6g/día | 3,6 | 3 | 21 | 60 | 72 | 0,050 | 103,03 € | 5,15 € | 206,06€ |  |
| **Mezavant 1,2g** comprimidos de liberación prolongada gastrorresistentes. | 1,2 | 4.8g/día | 4,8 | 4 | 28 | 60 | 72 | 0,067 | 103,03 € | 6,87 € | 206,06€ |  |
| **Salofalk 3g** granulado de liberación prolongada gastrorresistente. | 3 | 3 g/día | 3 | 1 | 7 | 60 | 180 | 0,017 | 153,98 € | 2,57 € | 76,99€ |  |

| **AMINOSALICILATOS Tópicos (rectal)** | | | | |  |  |  |  |  |  |  |
| --- | --- | --- | --- | --- | --- | --- | --- | --- | --- | --- | --- |
| CLAVERSAL 500 MG 100 SUPOSITORIOS | 0.5 | 0.5-1.5g/día | 1 | 2 | 14 | 100 | 50 | 0.050 | 45.60 € | 0,91 € |  |
| Claversal espuma rectal 2mg | 1 | 1-2g/día | 2 | 2 | 14 | 14 | 14 | 0.143 | 34.09 € | 4.87 € |  |
| PENTASA 1 G 28 SUPOSITORIOS | 1 | 1-2g/día | 1 | 1 | 7 | 28 | 28 | 0.035 | 47.43 € | 1,69 |  |
| PENTASA SUSPENSION RECTAL 1000 MG 7 ENVASES 100ML | 1 | 1 enema al acostarse | 1 | 1 | 7 | 7 | 7 | 0.143 | 17.05 € | 2.44 € |  |
| SALOFALK 1G 30 SUPOSITORIOS | 1 | 1g/día | 1 | 1 | 7 | 30 | 30 | 0.033 | 50.81 € | 1,69 € |  |
| SALOFALK 1G 80G ESPUMA RECTAL (14 APLICACIONES) | 1 | 2g/día | 2 | 2 | 14 | 14 | 14 | 0.143 | 34.09 € | 4.87 € |  |
| Salofalk 4g/60ml suspensión rectal, 7 enemas | 1 | 4g/día | 1 | 1 | 7 | 7 | 7 | 0.143 | 61.51 € | 8.79 € |  |
| **Coste promedio por día** | | | | | | | | | | **3,61€** |  |
| **Coste promedio para 28 días de tratamiento** | | | | | | | | | | **101.27€** |  |

| **DIPROPIONATO DE BECLAMETASONA** | | | | |  |  |  |  | |  |  |
| --- | --- | --- | --- | --- | --- | --- | --- | --- | --- | --- | --- |
| **Beclometasona 5mg** | 0,005 | 5mg por la mañana | 0,005 | 1 | 7 | 30 | 0,15 | 0,033 | 83,83 € | 2,79 € |  |
| **Coste promedio por día** | | | | | | | | | | **2,79€** |  |
| **Coste promedio para 28 días de tratamiento** | | | | | | | | | | **78,24€** |  |

| **Nombre medicamento** | **gramo/**  **unidad** | | **Posología** | **Dosis diaria (g)** | **Unidades/**  **día** | **Unidades/**  **semana** | **Tamaño del envase** | **g/envase** | **Envases/**  **día** | **Coste del envase** | **Coste/día** | **Coste mes de tratamiento** |
| --- | --- | --- | --- | --- | --- | --- | --- | --- | --- | --- | --- | --- |
| **PREDNISONA oral** | | |  |  |  |  |  |  |  |  |  |  |
| **Dacortín 2,5 mg comprimidos** | | 0,0025 | titrate | n/a | n/a | n/a | 30 | 0,075 | n/a | 1,89 € | 1,89 € | 105,84 € |
| **Dacortín 5mg comprimidos** | | 0,005 | titrate | n/a | n/a | n/a | 30 | 0,15 | n/a | 2,44 € | 2,44 € | 136,64 € |
| **Dacortín 30mg**  **comprimidos** | | 0,03 | titrate | n/a | n/a | n/a | 30 | 0,9 | n/a | 6,35 € | 6,35 € | 355,60 € |
| **Prednisona Alonga 5mg 30 comprimidos** | | 0,005 | titrate | n/a | n/a | n/a | 30 | 0,15 | n/a | 2,08 € | 2,08 € | 116,48 € |
| **Prednisona Alonga 10mg 30 comprimidos** | | 0,01 | titrate | n/a | n/a | n/a | 30 | 0,3 | n/a | 2,83 € | 2,83 € | 158,48 € |
| **Prednisona Alonga 50mg 30 comprimidos** | | 0,05 | titrate | n/a | n/a | n/a | 30 | 1,5 | n/a | 10,60 € | 10,60 € | 593,60 € |
| **Prednisona Kern Pharma 5mg 30 comp. eferv** | | 0,005 | titrate | n/a | n/a | n/a | 30 | 0,15 | n/a | 1,95 € | 1,95 € | 109,20 € |
| **Prednisona Kern Pharma 5mg 60 comp. eferv** | | 0,005 | titrate | n/a | n/a | n/a | 60 | 0,3 | n/a | 2,67 € | 2,67 € | 149,52 € |
| **Prednisona Kern Pharma 10mg 30 comp.** | | 0,01 | titrate | n/a | n/a | n/a | 30 | 0,3 | n/a | 2,54 € | 2,54 € | 142,24 € |
| **Prednisona Kern Pharma 30mg 30 comp.** | | 0,03 | titrate | n/a | n/a | n/a | 30 | 0,9 | n/a | 4,45 € | 4,45 € | 249,20 € |
| **Coste promedio día** | | | | | | | | | | | **3,78€** |  |
| **Coste promedio para 21 días de tratamiento** | | | | | | | | | | | **79,38€** |  |

| **AZATIOPRINA** | |  |  |  |  |  |  |  |  |  |
| --- | --- | --- | --- | --- | --- | --- | --- | --- | --- | --- |
| **Imurel 50mg comp.** | 50 | 2,5 | 200 | 4 | 28 | 50 | 2500 | 0,080 | 9,02 € | 0,72 € |
| **Coste promedio día** | | | | | | | | | | 0,72€ |
| **Coste promedio para 365 días de tratamiento** | | | | | | | | | | 256,89€ |

| **MERCAPTOPURINA** | |  |  |  |  |  |  |  |  |  |
| --- | --- | --- | --- | --- | --- | --- | --- | --- | --- | --- |
| **Mercaptopurina Glaxosmithkline 50mg 25 comp.** |  | 1 al día | 120mg |  |  |  |  |  | 6,37€ | **0,51€** |
| **Coste promedio 365 días de tratamiento** | | | | | | | | | | **186,0€** |

Tabla 2: Frecuencia de usos de recursos médicos no farmacológicos en ambos modelos

| **Recursos** | | | | **Tipo** | **Frecuencia** | **Fuente** | |
| --- | --- | --- | --- | --- | --- | --- | --- |
| **Test diagnósticos** | | | | Recuento sanguíneo y hemograma | ***Una a los 3 meses de empezar ASA y luego anual*** | GC-GETECCU, NICE CG166, Investigadores principales del estudio | |
| Prueba de función renal |
| Prueba de función hepática |
| Tiopurina metiltransferasa (TMPT) | 1 durante el primer año |
|  |  |  |  |  | ***Cada 4 semanas*** |  |  |
|  |  |  |  | Gastroenterólogo | 40 visitas por 100 pacientes | GC-GETECCU, NICE CG166, Investigadores principales del estudio | |
| **Consultas en** |  |  |  | Médico de Atención Primaria | 10 visitas por 100 pacientes |
| **enfermedad activa** |  |  |  | Enfermera especializada en EII (solo en 20% centros) | 20% * 30 visitas por 100 pacientes |
|  |  |  |  | Consulta telefónica con enfermera especializada en EII (solo en 20% de los centros) | 20% * 20 llamadas por 100 pacientes |
|  |  |  |  | Especialista residente (MIR) | 10 visitas por 100 pacientes |
|  |  |  |  |  | ***Anualmente*** |  |  |
|  |  |  |  | Gastroenterólogo | 50 visitas por 100 pacientes | GC-GETECCU, NICE CG166, Investigadores principales del estudio | |
| **Consultas en** |  |  |  | Médico de Atención Primaria | 100 visitas por 100 pacientes |
| **mantenimiento de remisión** |  |  |  | Enfermera especializada en EII (solo en 20% de los centros) | 20%* 50 visitas por 110 pacientes |
|  |  |  |  | Consulta telefónica con enfermera especializada en EII (solo en 20% de los centros) | 20%* 50 visitas por 110 pacientes |
|  |  |  |  | Especialista residente (MIR) | 50 visitas por 100 pacientes |
| **Hospitalización** | |  |  | GRD 179 Enfermedad inflamatoria intestinal | 1 por cada ingreso sin cirugía | Investigadores principales del estudio | |
|  |  |  |  | GRDs 152 Procedimientos menores de intestino delgado & grueso sin complicaciones | 1 valor de la media ponderada por frecuencia de uso obtenida del CMBD por cada ingreso con cirugía |
|  |  |  |  | GRDs 153 Procedimientos menores de intestino delgado & grueso con complicaciones |
|  |  |  |  | GRDs 148 Procedimientos mayores de intestino delgado & grueso con complicaciones |
|  |  |  |  | GRDs 149 Procedimientos mayores de intestino delgado & grueso sin complicaciones |

**Tabla 3: Costes de recursos médicos no farmacológicos (pruebas de laboratorio, consultas y hospitalización) (en € 2014)**

| **Costes de Monitorización CU** | **Promedio nacional** | **Desviación Estándar** |
| --- | --- | --- |
|  |  |  |
| Recuento sanguíneo y hemograma | 34,66 | 17,98 |
| Prueba de función renal |  |  |
| Prueba de función hepática |  |  |
| TMPT | 40,00 |  |
| Visitas |  |  |
| Gastroenterólogo |  |  |
| Primera consulta | 152,13 | 36,84 |
| Consultas sucesivas | 79,41 | 20,42 |
| Médico de Atención Primaria |  |  |
| Primera consulta | 63,31 | 22,55 |
| Consultas sucesivas |  |  |
| Enfermera especializada en EII (solo en 20% de los centros) |  |  |
| Primera consulta | 47,95 | 27,53 |
| Consultas sucesivas | 29,49 |  |
| Consulta telefónica con enfermera especializada en EII (solo en 20% de los centros) |  |  |
| Primera consulta | 23,08 | 13,54 |
| Consultas sucesivas |  |  |
| Especialista residente (MIR) |  |  |
| Primera consulta | 145,00 | 45,25 |
| Consultas sucesivas | 82,50 | 33,23 |
| Estancia hospitalaria |  |  |
| Sin cirugía (GRD 179) | 4.232,24 |  |
| Con cirugía (media ponderada por uso de GRDs 148, 149, 152, 153) | 10.068,54 |  |

**Tabla 4: Asunciones en ambos modelos**

| **Parámetro** | **Tipo de distribución** | **Propiedades de la distribución** | **Parámetros para la distribución** |
| --- | --- | --- | --- |
| **Costes y uso de recursos** | Gamma | Limitada por la izquierda en 0. Derivada de la media y el error estándar de la media (ESM) | α = (media/ESM)2 |
| λ = media/ESM2 |
| **Uso de recursos** | Triangular | Derivada de la opinión de los expertos o de las referencias bibliográficas | Min = Valor mínimo |
| Más probable = Media |
| Max = Valor máximo |
| **Efectos del tratamiento, ponderaciones de utilidad, costes de referencia** | Lognormal | Limitada por la izquierda en 0. Derivada del logaritmo neperiano de la media y el error estándar | µ = ln(RR) |
| DE(µ)= (ln(límite superior Intervalo de confianza 95%)-ln(límite inferior))/1.96*2 |
|
